# Supplementary material for: Multi-year Use of the Standard Gauge Railway Underpasses by Mammals in Tsavo, Kenya: Influence of Underpass Dimensions, Infrastructure and Ecology
Source: Research Square preprint supplement (doi:10.21203/rs.3.rs-1203884/v1), 2022-01-03
Supplement: Supplementary file 1 [file 662e8d9b67210479f8f8de28.docx]

Supplementary Materials


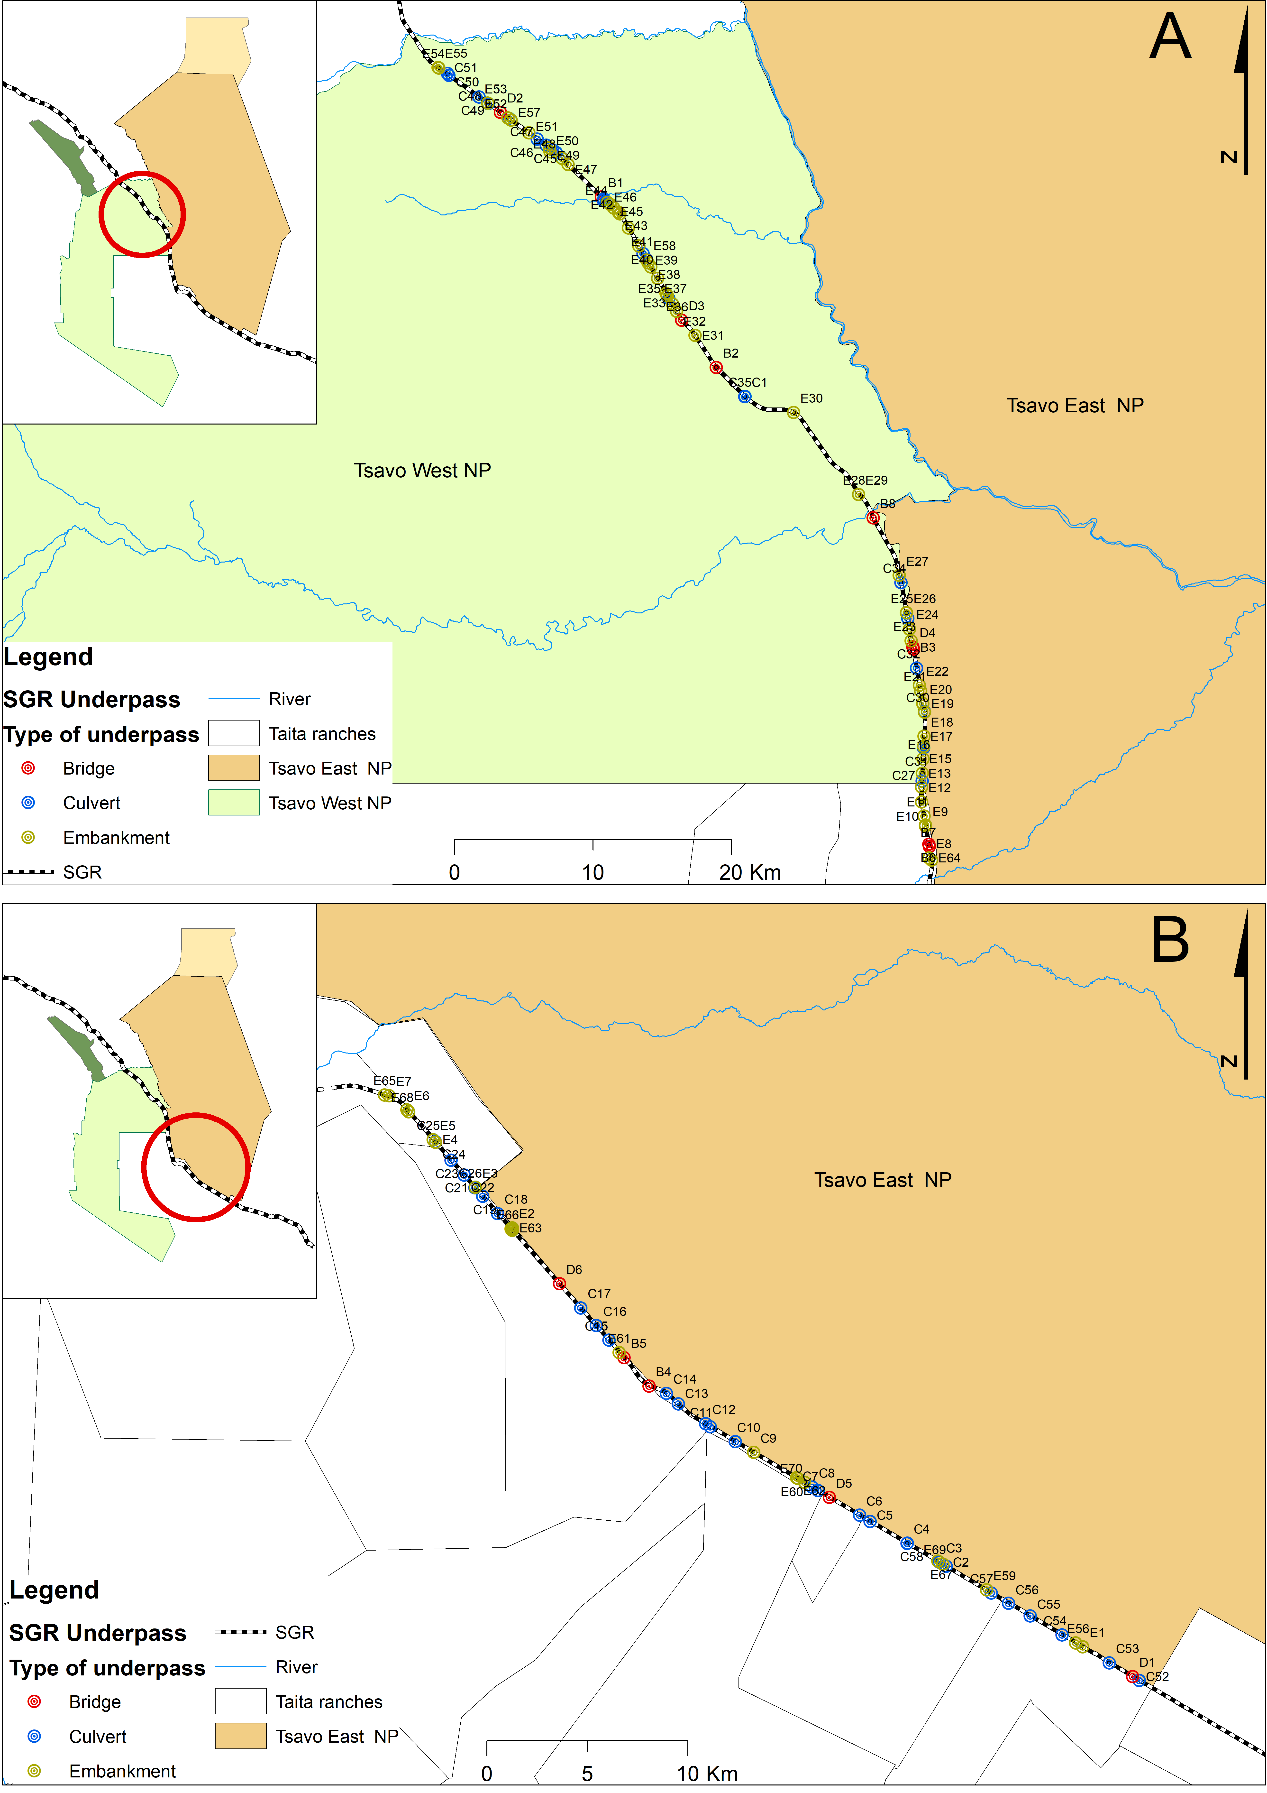


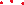


**Figure S1:** Underpass locations between Voi – Mtito-Andei (A) and Voi – Bachuma (B) along the standard gauge railway in Tsavo Conservation Area located in southeastern Kenya (inset).

Table S1. Location, type and dimensions of underpasses examined during this study

| **X- coordinate** | **Y coordinate** | **Underpass ID** | **Type of underpass** | **Road Section** | **Width meters** | **Height meters** | **Size** |
| --- | --- | --- | --- | --- | --- | --- | --- |
| 444273 | 9652304 | C31 | Culvert | VM | 3 | 2 | Medium |
| 417276 | 9695352 | C44 | Culvert | VM | 3 | 2 | Small |
| 443111 | 9661592 | C33 | Culvert | VM | 2 | 2.3 | Small |
| 486140 | 9598800 | C57 | Culvert | VB | 2 | 2.38 | Small |
| 470585 | 9608202 | C13 | Culvert | VB | 3 | 2.4 | Small |
| 442620 | 9664172 | C34 | Culvert | VM | 2 | 2.5 | Small |
| 421115 | 9691604 | C40 | Culvert | VM | 2 | 2.5 | Small |
| 416974 | 9695570 | C45 | Culvert | VM | 2 | 2.5 | Small |
| 416332 | 9696012 | C46 | Culvert | VM | 2 | 2.5 | Small |
| 412121 | 9699034 | C49 | Culvert | VM | 2 | 2.5 | Small |
| 487003 | 9598294 | C56 | Culvert | VB | 2 | 2.58 | Small |
| 461599 | 9617659 | C18 | Culvert | VB | 3 | 3 | Medium |
| 488078 | 9597664 | C55 | Culvert | VB | 6 | 3 | Medium |
| 472172 | 9607062 | C11 | Culvert | VB | 4 | 3.2 | Medium |
| 466513 | 9612090 | C16 | Culvert | VB | 4 | 3.2 | Medium |
| 483905 | 9600126 | C2 | Culvert | VB | 4 | 3.2 | Medium |
| 458404 | 9621328 | C25 | Culvert | VB | 4 | 3.2 | Medium |
| 460495 | 9618961 | C26 | Culvert | VB | 4 | 3.2 | Medium |
| 483566 | 9600336 | C3 | Culvert | VB | 2 | 3.2 | Small |
| 480122 | 9602356 | C5 | Culvert | VB | 3 | 3.3 | Small |
| 431341 | 9677520 | C1 | Culvert | VB | 3 | 3.5 | Small |
| 471936 | 9607214 | C12 | Culvert | VB | 3 | 3.5 | Small |
| 469995 | 9608722 | C14 | Culvert | VB | 3 | 3.5 | Small |
| 460856 | 9618517 | C19 | Culvert | VB | 3 | 3.5 | Small |
| 459942 | 9619567 | C22 | Culvert | VB | 4 | 3.5 | Medium |
| 459283 | 9620313 | C23 | Culvert | VB | 4 | 3.5 | Medium |
| 458514 | 9621231 | C24 | Culvert | VB | 6 | 3.5 | Medium |
| 444334 | 9654896 | C30 | Culvert | VM | 3 | 3.5 | Medium |
| 417426 | 9695248 | C43 | Culvert | VM | 3 | 3.5 | Small |
| 414271 | 9697510 | C47 | Culvert | VM | 3 | 3.5 | Small |
| 412789 | 9698558 | C48 | Culvert | VM | 3 | 3.5 | Small |
| 465736 | 9612968 | C17 | Culvert | VB | 4 | 3.7 | Medium |
| 467890 | 9610500 | B5 | Bridge | VB | 70 | 4 | Large |
| 467142 | 9611366 | C15 | Culvert | VB | 4 | 4 | Medium |
| 460472 | 9618938 | C21 | Culvert | VB | 6 | 4 | Medium |
| 481963 | 9601268 | C4 | Culvert | VB | 6 | 4 | Medium |
| 493493 | 9594462 | C52 | Culvert | VB | 6.8 | 4 | Medium |
| 489667 | 9596716 | C54 | Culvert | VB | 6 | 4 | Medium |
| 481970 | 9601281 | C58 | Culvert | VB | 6 | 4 | Medium |
| 479594 | 9602668 | C6 | Culvert | VB | 6 | 4 | Medium |
| 492016 | 9595328 | C53 | Culvert | VB | 6 | 4.5 | Medium |
| 473414 | 9606324 | C10 | Culvert | VB | 6 | 4.7 | Medium |
| 477244 | 9604060 | C8 | Culvert | VB | 6 | 4.7 | Medium |
| 474334 | 9605790 | C9 | Embankment | VB | 4 | 4.7 | Medium |
| 460485 | 9618949 | C20 | Culvert | VB | 4 | 5 | Medium |
| 477533 | 9603896 | C7 | Culvert | VB | 4 | 5 | Medium |
| 444154 | 9649910 | C27 | Culvert | VM | 6 | 5 | Medium |
| 444274 | 9652288 | C28 | Culvert | VM | 4 | 5 | Medium |
| 444254 | 9652324 | C29 | Culvert | VM | 4 | 5 | Medium |
| 443749 | 9658022 | C32 | Culvert | VM | 4 | 5 | Medium |
| 431348 | 9677528 | C35 | Culvert | VM | 5 | 5 | Medium |
| 424247 | 9687360 | C37 | Culvert | VM | 6 | 5 | Medium |
| 423985 | 9687796 | C38 | Culvert | VM | 6 | 5 | Medium |
| 418131 | 9694624 | C41 | Culvert | VM | 5 | 5 | Medium |
| 417697 | 9695042 | C42 | Culvert | VM | 6 | 5 | Medium |
| 409941 | 9700592 | C50 | Culvert | VM | 4 | 5 | Medium |
| 409835 | 9700722 | C51 | Culvert | VM | 5 | 5 | Medium |
| 493169 | 9594652 | D1 | Bridge | VB | 70 | 5.5 | Large |
| 425844 | 9684556 | C36 | Culvert | VM | 5 | 5.5 | Medium |
| 421151 | 9691706 | C39 | Culvert | VM | 4 | 5.5 | Medium |
| 464682 | 9614172 | D6 | Bridge | VB | 65 | 5.6 | Large |
| 478101 | 9603552 | D5 | Bridge | VB | 70 | 6 | Large |
| 426785 | 9683008 | D3 | Bridge | VM | 70 | 6 | Large |
| 443536 | 9659372 | B3 | Bridge | VM | 20 | 6.5 | Large |
| 443480 | 9659544 | D4 | Bridge | VM | 70 | 6.5 | Large |
| 444661 | 9645378 | B6 | Bridge | VM | 25 | 6.8 | Large |
| 444685 | 9645210 | B7 | Bridge | VM | 60 | 6.8 | Large |
| 413674 | 9697936 | D2 | Bridge | VM | 60 | 7 | Large |
| 469134 | 9609086 | B4 | Bridge | VB | 180 | 7.3 | Large |
| 440619 | 9668820 | B8 | Bridge | VM | 1960 | 9 | Large |
| 429274 | 9679622 | B2 | Bridge | VM | 520 | 10 | Large |
| 420962 | 9691854 | B1 | Bridge | VM | 210 | 12 | Large |

Table S2: Large- and medium-sized mammal sightings in the TCA 2008-2015

| Species/Taxon | Total sightings | Sighting frequency per month |
| --- | --- | --- |
| African elephant | 1677 | 30.491 |
| Grant’s gazelle | 1317 | 23.945 |
| Dik-dik | 1046 | 19.018 |
| Plain’s zebra | 919 | 16.709 |
| Impala | 773 | 14.055 |
| Waterbuck | 497 | 9.036 |
| Gerenuk | 447 | 8.127 |
| Maasai giraffe | 418 | 7.600 |
| Coke's hartebeest | 395 | 7.182 |
| Warthog | 345 | 6.273 |
| Buffalo | 251 | 4.564 |
| Oryx | 186 | 3.382 |
| Kongoni (Hartebeest) | 176 | 3.200 |
| Lesser kudu | 170 | 3.091 |
| Baboon | 117 | 2.127 |
| Hippopotamus | 61 | 1.109 |
| Eland | 54 | 0.982 |
| Black-backed jackal | 31 | 0.564 |
| Vervet monkey | 28 | 0.509 |
| Lion | 24 | 0.436 |
| Common duiker | 19 | 0.345 |
| Banded mongoose | 14 | 0.255 |
| Cheetah | 11 | 0.200 |
| Hirola | 11 | 0.200 |
| Thomson’s gazelle | 9 | 0.164 |
| Topi | 6 | 0.109 |
| Spotted hyena | 4 | 0.073 |
| Klipspringer | 3 | 0.055 |
| Livestock | 2 | 0.036 |
| Bat-eared fox | 2 | 0.036 |
| Rock hyrax | 2 | 0.036 |
| African wild cat | 2 | 0.036 |
| Aardwolf | 1 | 0.018 |
| Bat eared fox | 1 | 0.018 |
| Genet | 1 | 0.018 |
| Grevy’s zebra | 1 | 0.018 |
| Leopard | 1 | 0.018 |
| Reed buck | 1 | 0.018 |
| Rhinoceros | 1 | 0.018 |
| Silver-backed jackal | 1 | 0.018 |

Table S3. The frequency and proportion of time the underpass was used by all large- and medium-sized mammals in the TCA.

| Species/Taxon | Bridge |  | Culvert | | Embankment | | Total | |
| --- | --- | --- | --- | --- | --- | --- | --- | --- |
| Count | Ratio | Count | Ratio | Count | Ratio | Count | Ratio |
| Livestock | 389 | 0.1675 | 1070 | 0.1116 | 0 | 0.0000 | 1459 | 0.06242 |
| African elephant | 708 | 0.3048 | 348 | 0.0363 | 303 | 0.0264 | 1359 | 0.05814 |
| Plains zebra | 470 | 0.2023 | 97 | 0.0101 | 39 | 0.0034 | 606 | 0.02593 |
| Yellow baboon | 287 | 0.1235 | 263 | 0.0274 | 0 | 0.0000 | 550 | 0.02353 |
| Buffalo | 176 | 0.0758 | 135 | 0.0141 | 44 | 0.0038 | 355 | 0.01519 |
| Dik-dik | 179 | 0.0771 | 103 | 0.0107 | 0 | 0.0000 | 282 | 0.01207 |
| Spotted hyena | 129 | 0.0555 | 117 | 0.0122 | 3 | 0.0003 | 249 | 0.01065 |
| Mongoose | 76 | 0.0327 | 164 | 0.0171 | 0 | 0.0000 | 240 | 0.01027 |
| Carnivore | 50 | 0.0215 | 67 | 0.0070 | 0 | 0.0000 | 117 | 0.00501 |
| Antelope | 55 | 0.0237 | 46 | 0.0048 | 0 | 0.0000 | 101 | 0.00432 |
| Impala | 57 | 0.0245 | 8 | 0.0008 | 9 | 0.0008 | 74 | 0.00317 |
| Leopard | 19 | 0.0082 | 40 | 0.0042 | 3 | 0.0003 | 62 | 0.00265 |
| Civet | 36 | 0.0155 | 2 | 0.0002 | 0 | 0.0000 | 38 | 0.00163 |
| Waterbuck | 17 | 0.0073 | 5 | 0.0005 | 13 | 0.0011 | 35 | 0.00150 |
| Lesser kudu | 20 | 0.0086 | 14 | 0.0015 | 0 | 0.0000 | 34 | 0.00145 |
| Lion | 13 | 0.0056 | 9 | 0.0009 | 4 | 0.0003 | 26 | 0.00111 |
| Black-backed jackal | 8 | 0.0034 | 13 | 0.0014 | 1 | 0.0001 | 22 | 0.00094 |
| Vervet monkey | 21 | 0.0090 | 0 | 0.0000 | 0 | 0.0000 | 21 | 0.00090 |
| Warthog | 5 | 0.0022 | 11 | 0.0011 | 4 | 0.0003 | 20 | 0.00086 |
| Grant’s gazelle | 8 | 0.0034 | 4 | 0.0004 | 0 | 0.0000 | 12 | 0.00051 |
| Caracal | 3 | 0.0013 | 8 | 0.0008 | 0 | 0.0000 | 11 | 0.00047 |
| Cape hare | 9 | 0.0039 | 0 | 0.0000 | 1 | 0.0001 | 10 | 0.00043 |
| Eland | 0 | 0.0000 | 0 | 0.0000 | 9 | 0.0008 | 9 | 0.00039 |
| Banded mongoose | 1 | 0.0004 | 5 | 0.0005 | 0 | 0.0000 | 6 | 0.00026 |
| Porcupine | 1 | 0.0004 | 5 | 0.0005 | 0 | 0.0000 | 6 | 0.00026 |
| Cheetah | 2 | 0.0009 | 2 | 0.0002 | 0 | 0.0000 | 4 | 0.00017 |
| Genet | 2 | 0.0009 | 2 | 0.0002 | 0 | 0.0000 | 4 | 0.00017 |
| Grevy’s zebra | 1 | 0.0004 | 0 | 0.0000 | 3 | 0.0003 | 4 | 0.00017 |
| Hippopotamus | 3 | 0.0013 | 1 | 0.0001 | 0 | 0.0000 | 4 | 0.00017 |
| Wild dog | 0 | 0.0000 | 3 | 0.0003 | 0 | 0.0000 | 3 | 0.00013 |
| Aardwolf | 1 | 0.0004 | 1 | 0.0001 | 0 | 0.0000 | 2 | 0.00009 |
| Slender mongoose | 2 | 0.0009 | 0 | 0.0000 | 0 | 0.0000 | 2 | 0.00009 |
| Small spotted genet | 1 | 0.0004 | 1 | 0.0001 | 0 | 0.0000 | 2 | 0.00009 |
| Maasai giraffe | 0 | 0.0000 | 2 | 0.0002 | 0 | 0.0000 | 2 | 0.00009 |
| Honey badger | 0 | 0.0000 | 1 | 0.0001 | 0 | 0.0000 | 1 | 0.00004 |
| African wild cat | 0 | 0.0000 | 1 | 0.0001 | 0 | 0.0000 | 1 | 0.00004 |
| Bush baby | 0 | 0.0000 | 1 | 0.0001 | 0 | 0.0000 | 1 | 0.00004 |
| Common duiker | 1 | 0.0004 | 0 | 0.0000 | 0 | 0.0000 | 1 | 0.00004 |

Table S4. The influence of electric fencing on the use of SGR underpasses by wildlife in the TCA.

| Type of underpass | Underpass | | Embankment | | Underpass | | Embankment | |
| --- | --- | --- | --- | --- | --- | --- | --- | --- |
| Fencing Present | N | Y | N | Y | N | Y | N | Y |
| Livestock | 504 | 955 | 0 | 0 | 0.0806 | 0.1688 | 0.0000 | 0.0000 |
| African elephant | 643 | 413 | 298 | 5 | 0.1028 | 0.0730 | 0.0489 | 0.0009 |
| Baboon | 151 | 399 | 0 | 0 | 0.0242 | 0.0705 | 0.0000 | 0.0000 |
| Plain’s zebra | 231 | 336 | 39 | 0 | 0.0369 | 0.0594 | 0.0064 | 0.0000 |
| Mongoose | 17 | 223 | 0 | 0 | 0.0027 | 0.0394 | 0.0000 | 0.0000 |
| Buffalo | 100 | 211 | 44 | 0 | 0.0160 | 0.0373 | 0.0072 | 0.0000 |
| Dik-dik | 76 | 206 | 0 | 0 | 0.0122 | 0.0364 | 0.0000 | 0.0000 |
| Spotted hyena | 71 | 175 | 3 | 0 | 0.0114 | 0.0309 | 0.0005 | 0.0000 |
| Antelope | 14 | 87 | 0 | 0 | 0.0022 | 0.0154 | 0.0000 | 0.0000 |
| Carnivore | 42 | 75 | 0 | 0 | 0.0067 | 0.0133 | 0.0000 | 0.0000 |
| Impala | 19 | 46 | 9 | 0 | 0.0030 | 0.0081 | 0.0015 | 0.0000 |
| Leopard | 33 | 26 | 2 | 1 | 0.0053 | 0.0046 | 0.0003 | 0.0002 |
| Lesser kudu | 13 | 21 | 0 | 0 | 0.0021 | 0.0037 | 0.0000 | 0.0000 |
| Vervet monkey | 2 | 19 | 0 | 0 | 0.0003 | 0.0034 | 0.0000 | 0.0000 |
| Civet | 20 | 18 | 0 | 0 | 0.0032 | 0.0032 | 0.0000 | 0.0000 |
| Lion | 6 | 16 | 4 | 0 | 0.0010 | 0.0028 | 0.0007 | 0.0000 |
| Warthog | 5 | 11 | 4 | 0 | 0.0008 | 0.0019 | 0.0007 | 0.0000 |
| Cape hare | 1 | 8 | 1 | 0 | 0.0002 | 0.0014 | 0.0002 | 0.0000 |
| Porcupine | 0 | 6 | 0 | 0 | 0.0000 | 0.0011 | 0.0000 | 0.0000 |
| Waterbuck | 17 | 5 | 13 | 0 | 0.0027 | 0.0009 | 0.0021 | 0.0000 |
| Black-backed Jackal | 17 | 4 | 1 | 0 | 0.0027 | 0.0007 | 0.0002 | 0.0000 |
| Caracal | 8 | 3 | 0 | 0 | 0.0013 | 0.0005 | 0.0000 | 0.0000 |
| Wild dog | 1 | 2 | 0 | 0 | 0.0002 | 0.0004 | 0.0000 | 0.0000 |
| Hippopotamus | 2 | 2 | 0 | 0 | 0.0003 | 0.0004 | 0.0000 | 0.0000 |
| Honey badger | 0 | 1 | 0 | 0 | 0.0000 | 0.0002 | 0.0000 | 0.0000 |
| Slender mongoose | 1 | 1 | 0 | 0 | 0.0002 | 0.0002 | 0.0000 | 0.0000 |
| African wild cat | 0 | 1 | 0 | 0 | 0.0000 | 0.0002 | 0.0000 | 0.0000 |
| Grevy’s zebra | 0 | 1 | 3 | 0 | 0.0000 | 0.0002 | 0.0005 | 0.0000 |
| Hedgehog | 0 | 1 | 0 | 0 | 0.0000 | 0.0002 | 0.0000 | 0.0000 |
| Aardwolf | 2 | 0 | 0 | 0 | 0.0003 | 0.0000 | 0.0000 | 0.0000 |
| Banded mongoose | 6 | 0 | 0 | 0 | 0.0010 | 0.0000 | 0.0000 | 0.0000 |
| Cheetah | 4 | 0 | 0 | 0 | 0.0006 | 0.0000 | 0.0000 | 0.0000 |
| Genet | 4 | 0 | 0 | 0 | 0.0006 | 0.0000 | 0.0000 | 0.0000 |
| Small-spotted genet | 2 | 0 | 0 | 0 | 0.0003 | 0.0000 | 0.0000 | 0.0000 |
| Bush baby | 1 | 0 | 0 | 0 | 0.0002 | 0.0000 | 0.0000 | 0.0000 |
| Common duiker | 1 | 0 | 0 | 0 | 0.0002 | 0.0000 | 0.0000 | 0.0000 |
| Eland | 0 | 0 | 9 | 0 | 0.0000 | 0.0000 | 0.0015 | 0.0000 |
| Grant’s gazelle | 12 | 0 | 0 | 0 | 0.0019 | 0.0000 | 0.0000 | 0.0000 |
| Maasai giraffe | 2 | 0 | 0 | 0 | 0.0003 | 0.0000 | 0.0000 | 0.0000 |
